# Supplementary material
Source: PubMed Central journal article supplement (PMC3592147)
Supplement: JVI.02863-12_zjv999097410so2.pdf [file JVI.02863-12_zjv999097410so2.pdf]

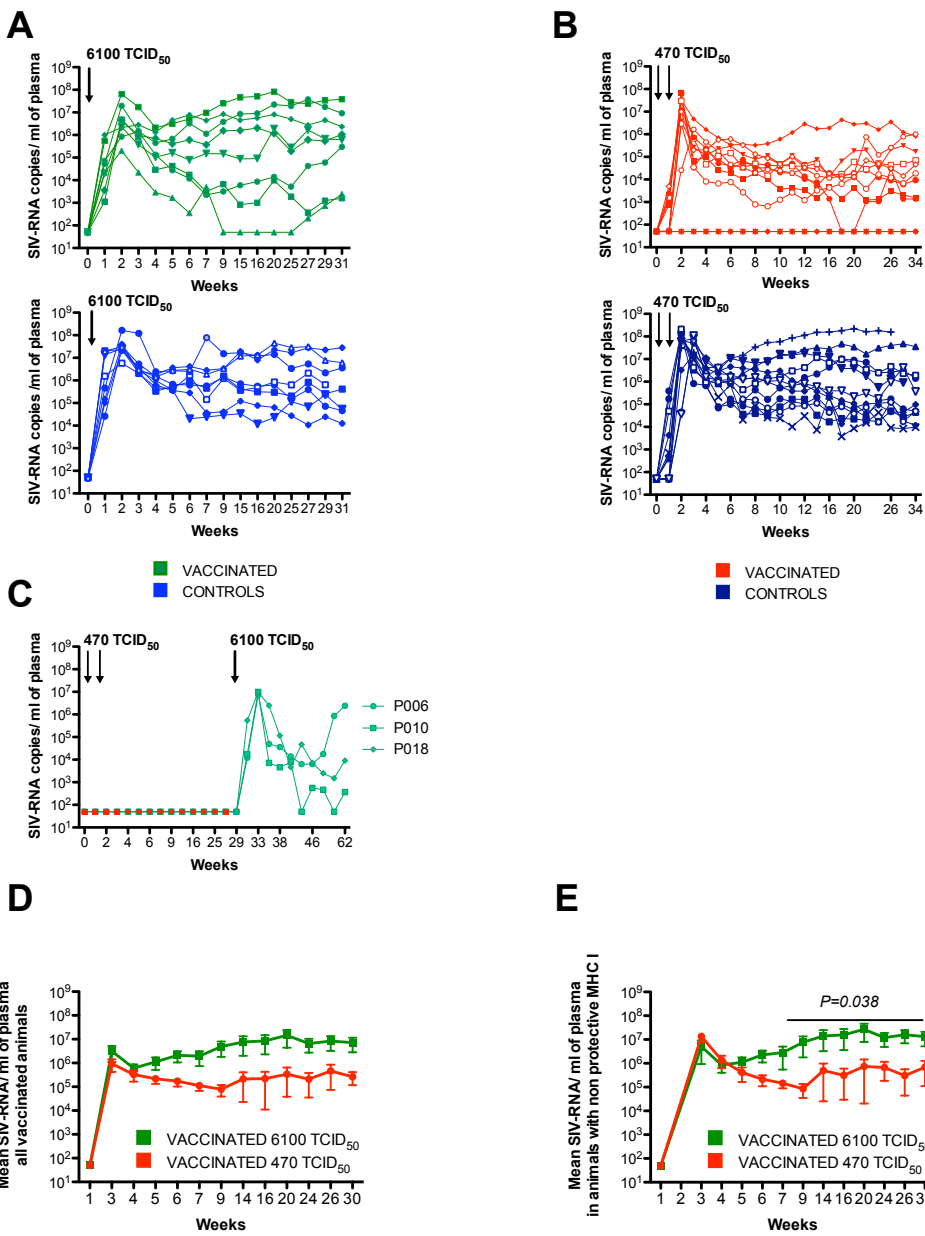

**Fig. S1**

**Supplemental Figure 1**

SIV-RNA copies/ml of plasma in each vaccinated (**A**) and control animal exposed to one dose of 6100 TCID<sub>50</sub>, and (**B**) vaccinated and controls animal exposed to two doses of 470 TCID<sub>50</sub> of SIV<sub>mac251</sub>. At this dose, three animals remained uninfected.

(**C**) SIV-RNA copies per ml of plasma in the vaccinated P006, P010, and P018, animals that were protected from SIV<sub>mac251</sub> acquisition following 2 intra-rectal exposures to 470 TCID<sub>50</sub> SIV<sub>mac251</sub> (2 thin arrows) but become infected following an additional intra-rectal exposure to 6100 TCID<sub>50</sub> (thick arrow) of the same virus stock.

(**D**) Plasma SIV- RNA as mean ± standard error for all vaccinated and (**E**) vaccinated animals negative for protective MHC I alleles (MamuA\*01-, B\*04- and B\*17-), exposed to 6100 TCID<sub>50</sub> (4 macaques) or 470 TCID<sub>50</sub> of SIV<sub>mac251</sub> (6 macaques). For better comparison the peak viral load have been aligned in these graphs.
