# Supplementary material
Source: PubMed Central journal article supplement (PMC3592147)
Supplement: JVI.02863-12_zjv999097410so3.pdf [file JVI.02863-12_zjv999097410so3.pdf]

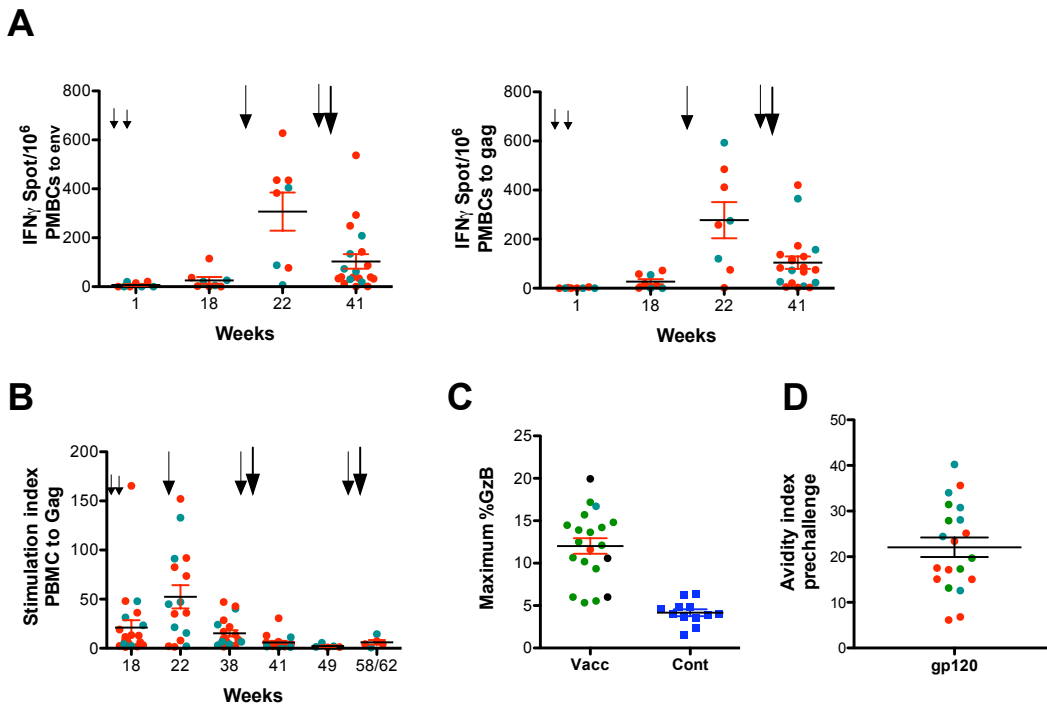

**Fig. S2**

**Supplemental Figure 2**

Animals that were exposed to 470 TCID<sub>50</sub> or 6100 TCID<sub>50</sub> are depicted in red and green respectively, in all the figures, animals protected against the first two challenges with 470 TCID<sub>50</sub> are depicted in black in C and D.

**(A)** IFN- $\gamma$  ELISPOT assay in fresh PBMCs following stimulation with overlapping Gag (p27, left panel) and Env (gp120, right panel) peptide pools.

Data are expressed as number of spots per 10<sup>6</sup> cells per animal.

The line represents the average and standard deviation for all the nine vaccinated macaques at weeks 1, 18, 22 and 20 macaques at weeks 41 and 58/62.

The arrows indicate vaccinations.

**(B)** Lymph proliferative responses to p27 Gag. The bars represent the average and standard deviation for all the twenty vaccinated animals.

**(C)** Maximum % granzyme measure in plasma one week before exposure. Controls are in blue.

**(D)** Gp120 Avidity index in plasma from all vaccinated animals one week before SIV exposure.
